# Supplementary material for: Effects of hesperidin on mitochondrial function, mitochondria-associated endoplasmic reticulum membranes and IP3R–MCU calcium axis in the intestine of piglets exposed to deoxynivalenol
Source: Royal Society of Chemistry journal article supplement (doi:10.1039/d4fo00783b), 2024-01-01
Supplement: d4fo00783b1.pdf [file d4fo00783b1.pdf]

11 Supplementary table S1. Ingredients and nutrients composition of the basal diet<sup>a</sup>

| Ingredients                         | g/kg | Nutrition component         | g/kg   |
|-------------------------------------|------|-----------------------------|--------|
| Corn                                | 660  | Analyzed composition        |        |
| Soybean meal                        | 263  | NE <sup>c</sup> , (Kcal/kg) | 2464.7 |
| Fish meal                           | 30   | Crude protein               | 191.2  |
| Soybean oil                         | 15   | Lysine                      | 12.4   |
| L-Lysine-HCL                        | 2    | Methionine                  | 3.9    |
| DL-methionine                       | 1    | Calcium                     | 8.5    |
| Dicalcium phosphate                 | 10   | Total phosphorus            | 6.6    |
| Limestone                           | 6    | DON                         | -      |
| Sodium chloride                     | 3    |                             |        |
| vitamin-mineral-premix <sup>b</sup> | 10   |                             |        |

12 <sup>a</sup>“-” means lower than the detection limit of 250 µg/kg for DON; experimental groups  
 13 consisted of piglets fed with different dietary conditions: Control: basal diet; HSE  
 14 group: basal diet + 300 mg/kg hesperidin (HSE); DON: basal diet+1.5 mg/kg DON;  
 15 DON+HSE group: basal diet+1.5 mg/kg DON + 300 mg/kg HSE. The concentrations  
 16 of DON were measured in Control, HSE, DON and DON+HSE group groups, resulting  
 17 in values of -, -,1.53 and 1.55 mg/kg, respectively.

18 <sup>b</sup>Premix provided per kg diet: copper, 6 mg; iron, 100 mg; manganese, 4 mg; zinc, 100  
 19 mg; iodine, 0.14 mg; selenium, 0.30 mg; vitamin A, 11,375 IU; vitamin D3, 3,500 IU;  
 20 vitamin E, 28 mg; vitamin K, 3.5 mg; vitamin B<sub>1</sub>, 3.5 mg; vitamin B<sub>2</sub>, 8.75 mg; niacin,  
 21 35 mg; pantothenic, 17.5 mg; vitamin B<sub>6</sub>, 4.2 mg; vitamin B<sub>12</sub>, 42 µg; biotin, 175 µg;  
 22 folic acid, 1.75 mg.

23 <sup>c</sup> NE was calculated from data provide by Feed Database in China (2022).

24

| Gene                 | Primer  | Primer sequence (5'-3')   | Accession No.  | length |
|----------------------|---------|---------------------------|----------------|--------|
| ACSL4 <sup>1</sup>   | Forward | GTAACCTGTGTGGCGGGCTCT     | NM_001038694.1 | 462    |
|                      | Reverse | ACTCTTCGAAGGCAAGTTGGG     |                |        |
| GPX4 <sup>2</sup>    | Forward | GAGCTGACGGTCAAGACCAA      | NM_214407.1    | 252    |
|                      | Reverse | TTGGTGACGATGCACACGTA      |                |        |
| HSPB1 <sup>3</sup>   | Forward | GAGCTGACGGTCAAGACCAA      | NM_001007518.1 | 226    |
|                      | Reverse | CAGGGATGGTGATCTCTGCC      |                |        |
| SLC7A11 <sup>4</sup> | Forward | CTCCTTCATTCCAAATTTCCACTT  | XM_021101587.1 | 238    |
|                      | Reverse | ACAACCTTGGAGGGTTCTTGT     |                |        |
| TFRC <sup>5</sup>    | Forward | ACGAGGGCGGGTTCTTTTG       | NM_214001.1    | 371    |
|                      | Reverse | TCTGTCTCTGAAGGCTCTGTTGGTA |                |        |
| GAPDH <sup>6</sup>   | Forward | ATGGTGAAGGTCGGAGTGAAC     | NM001206359    | 235    |
|                      | Reverse | CTCGCTCCTGGAAGATGGT       |                |        |

25 Supplementary table S2. Primers used for real-time PCR

26 <sup>1</sup>*ACSL4*, acyl-CoA synthetase long chain family member 4; <sup>2</sup>*GPX4*, glutathione  
27 peroxidase 4; <sup>3</sup>*HSPB1*, heat shock protein family B (small) member 1; <sup>4</sup>*SLC7A11*,  
28 solute carrier family 7 member 11; <sup>5</sup>*TFRC*, transferrin receptor; <sup>6</sup>*GAPDH*,  
29 glyceraldehyde 3-phosphate dehydrogenase.

31 Supplementary table S3. List of antibodies used for western blot analysis<sup>a</sup>

| Antibody       | Isotype | Source                                      |
|----------------|---------|---------------------------------------------|
| $\beta$ -actin | Rabbit  | Abclonal (Wuhan, China)                     |
| IP3Rs          | Mouse   | Santa Cruz Biotechnology (Santa Cruz, CA)   |
| VDAC1          | Mouse   | Santa Cruz Biotechnology (Santa Cruz, CA)   |
| GRP75          | Mouse   | HuaAn Biotechnology (Hangzhou, China)       |
| Mfn1           | Rabbit  | Cell Signaling Technology (Boston, MA, USA) |
| Mfn2           | Rabbit  | Cell Signaling Technology (Boston, MA, USA) |
| MCU            | Rabbit  | HuaAn Biotechnology (Hangzhou, China)       |
| MCUR1          | Rabbit  | HuaAn Biotechnology (Hangzhou, China)       |

32 IP3Rs, inositol 1,4,5-triphosphate receptors; VDAC1, voltage dependent anion-  
 33 selective channel protein 1; GRP75, glucose regulated protein 75; Mfn1, mitofusin 1;  
 34 Mfn2, mitofusin 2; MCU, mitochondrial calcium uniporter; MCUR1, mitochondrial  
 35 calcium uniporter regulator 1.

36

37 Supplementary figure 1.

38

(A)

39

40

41

42

43

44

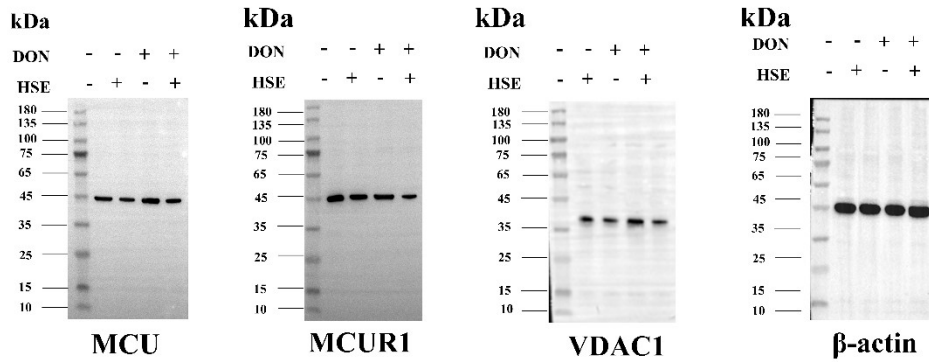

45

(B)

46

47

48

49

50

51

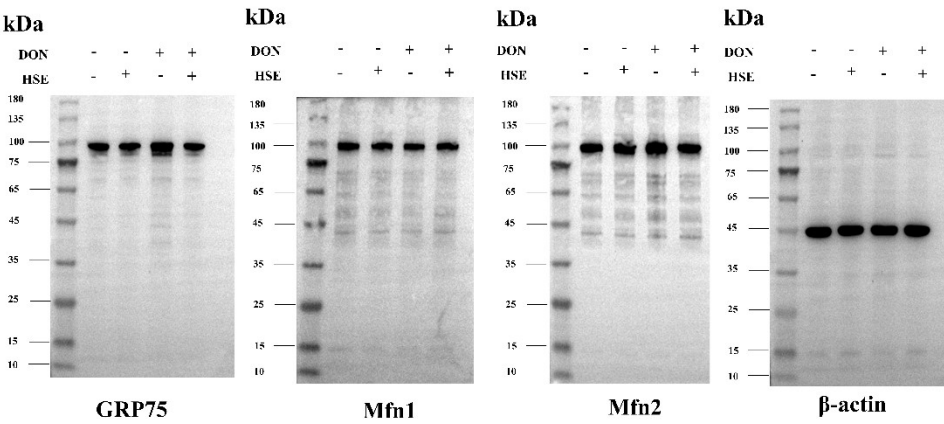

52

(C)

53

54

55

56

57

58

59

60

61

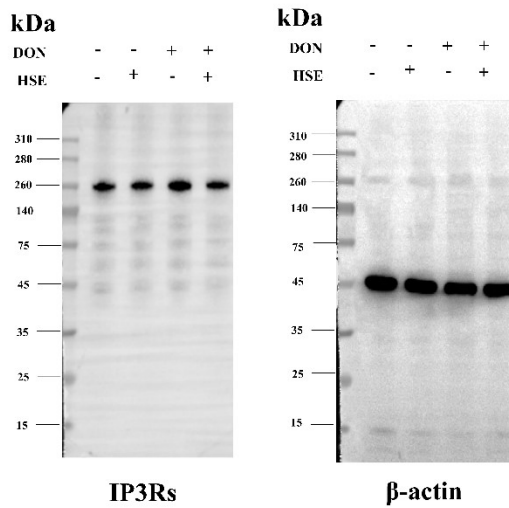

62 Figure S1: Original data of western blots for MCU, MCUR1, VDAC1 (A), GRP75,

63 Mfn1, Mfn2 (B) and IP3Rs (C).
